# Supplementary material for: Association of Pharmaceutical Industry Payments to Physicians With Prescription and Medicare Expenditures for Pimavanserin
Source: Atypon-hosted journal article supplement (doi:10.1176/appi.ps.202000251), 2020-08-25
Supplement: appi.ps.202000251.ds001.pdf [file appi.ps.202000251.ds001.pdf]

Supplementary Figure 1. Contribution of Payment Categories to the Total Payment by the Level of Physician Payment

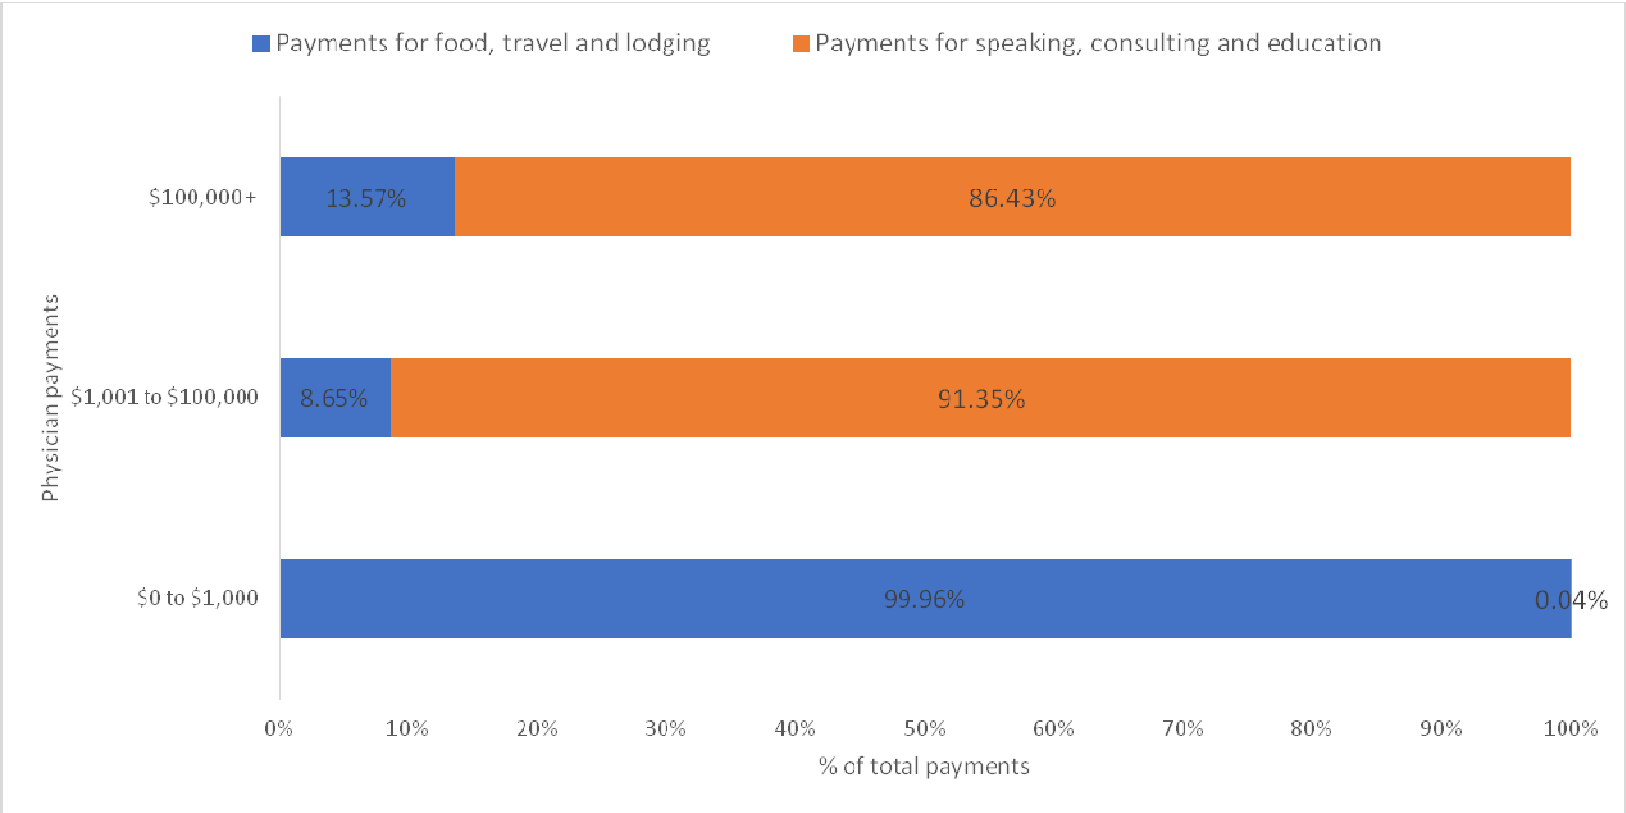

**Supplementary Table 1. Physician Payments, Pimavanserin Prescribing and Medicare Expenditures for Pimavanserin by Physician Specialty**

| <b>Specialty<sup>a,b</sup></b> | <b>N</b>          | <b>%</b> | <b>Median (IQR)</b>                           | <b>Mean (SD)</b> | <b>Total</b> |
|--------------------------------|-------------------|----------|-----------------------------------------------|------------------|--------------|
|                                | <b>Physicians</b> |          | <b>Physician Payments \$</b>                  |                  |              |
| Neurology                      | 809               | 50       | 42 (0-162)                                    | 5,890 (22,039)   | 4,764,689    |
| Psychiatry                     | 108               | 7        | 11 (0-248)                                    | 13,543 (35,722)  | 1,462,615    |
| Other                          | 692               | 43       | 0 (0-0)                                       | 206 (2,955)      | 142,618      |
|                                | <b>Physicians</b> |          | <b>Pimavanserin Prescribing, No.</b>          |                  |              |
| Neurology                      | 809               | 50       | 20 (13-31)                                    | 31 (34)          | 24,865       |
| Psychiatry                     | 108               | 7        | 14 (12-26)                                    | 25 (41)          | 2,730        |
| Other                          | 692               | 43       | 18 (13-25)                                    | 23 (18)          | 15,570       |
|                                | <b>Physicians</b> |          | <b>Medicare Expenditures for Pimavanserin</b> |                  |              |
| Neurology                      | 809               | 50       | 44,329 (29,422-74,607)                        | 69,189 (73,684)  | 55,973,843   |
| Psychiatry                     | 108               | 7        | 30,307 (25,613-46,829)                        | 48,530 (76,646)  | 5,241,283    |
| Other                          | 692               | 43       | 22,884 (15,664-31,749)                        | 30,580 (36,281)  | 21,161,587   |

<sup>a</sup> Physician specialty is derived from the Medicare provider/supplier specialty code reported on the National Provider Identifier's Part B claims. For providers that have more than one Medicare specialty code reported on their claims, the Medicare specialty code associated with the largest number of services is reported. Where a prescriber's NPI did not have associated Part B claims, the taxonomy code associated with the NPI in NPPES is mapped to a Medicare specialty code using an external crosswalk. Full methodological details are provided at [https://www.cms.gov/Research-Statistics-Data-and-Systems/Statistics-Trends-and-Reports/Medicare-Provider-Charge-Data/Downloads/Prescriber\\_Methods.pdf](https://www.cms.gov/Research-Statistics-Data-and-Systems/Statistics-Trends-and-Reports/Medicare-Provider-Charge-Data/Downloads/Prescriber_Methods.pdf).

<sup>b</sup> Neurology (809 physicians) included neurology (805), neurosurgery (3) and neurological surgery (1). Psychiatry (108 physicians) included psychiatry (88), psychiatry & neurology (14), neuropsychiatry (2) and geriatric psychiatry (4). Other specialty (692 physicians) includes internal medicine (257), family practice (192), nurse practitioner (126), physician assistant (43), geriatric medicine (30), general practice (13), pulmonary disease (5), certified clinical nurse specialist (4), emergency medicine (3), nephrology (3), physical medicine and rehabilitation (3), cardiology (2), pediatric medicine (2), dentist (1), endocrinology (1), gastroenterology (1), general surgery (1), hospice and palliative care (1), interventional pain management (1), orthopedic surgery (1), otolaryngology (1) and clinical psychologist (1).
